# Supplementary material
Source: publisher figshare collection journal article supplement (https://tandf.figshare.com/ndownloader/files/17413376)
Supplement: Supplementary file 1 [file 17413376]

**Appendix 1:** Worldwide territories and regions of leopard seal occurrence.

Geographical territories and regions where leopard seals have been recorded and their occurrence patterns in these areas is shown in Table 1.1. The term ‘seasonal’ is used within the framework of presence for some months of the year only, i.e., they have not been recorded year-round. The term ‘year-round’ is used within the framework of their presence for all months of the year but may only refer to some areas within the region. If conflicting information existed regarding ‘seasonal’ versus ‘year-round’ occurrence in region, then both occurrence types were listed. Note that only one reference is cited for either seasonal or year-round, although we recognise that there are multiple publications to support occurrence patterns for some locations.

**Table 1.1:** Geographical territories and regions where leopard seals have been recorded and their occurrence patterns in these areas.

| <b>Territory</b> | <b>Region</b>            | <b>Occurrence</b>                                  |
|------------------|--------------------------|----------------------------------------------------|
| Antarctica       | Mainland                 | Year-round (Rice 1998)                             |
|                  | Balleny Islands          | Seasonal (Wilson 1966)                             |
|                  | Paulet Island            | Seasonal (Anderson 1908)                           |
|                  | South Orkney Islands     | Year-round (Rice 1998)<br>Seasonal (Hamilton 1939) |
|                  | South Shetland Islands   | Year-round (Rice 1998)                             |
|                  |                          | Seasonal (Hamilton 1939)                           |
| Australia        | Mainland                 | Seasonal (King 1983)                               |
|                  | Heard & McDonald Islands | Year-round (Brown 1957)                            |
|                  | Heron Island             | Seasonal (King 1983)                               |
|                  | King Island              | Seasonal (Troughton 1951)                          |
|                  | Lord Howe Island         | Seasonal (King 1983)                               |
|                  | Macquarie Island         | Year-round (Rice 1998)                             |
|                  |                          | Seasonal (Rounsevell and Eberhard 1980)            |
|                  | Stradbroke Island        | Seasonal (Haynes-Lovell 1994)                      |
| Cook Islands     | Tasmania                 | Seasonal (King 1983)                               |
|                  | Cook Islands             | Seasonal (King 1983)                               |
| France           | Amsterdam Island         | Seasonal (Rice 1998)                               |
|                  | Crozet Islands           | Seasonal (Rice 1998)                               |
|                  | French Polynesia         | Seasonal (Reeves et al. 1992)                      |
|                  | Kerguelen Islands        | Year-round (Bester and Roux 1986)                  |
|                  | Saint-Paul Islands       | Seasonal (Rice 1998)                               |
| New Zealand      | Mainland                 | Seasonal (Falla 1965)                              |
|                  |                          | Year-round (King 1983)                             |
| Norway           | Bouvet Island            | Year-round (Rice 1998)                             |
| Solomon Islands  | New Georgia              | Seasonal (Wilson 1907)                             |
| South Africa     | Prince Edward Island     | Seasonal (Rice 1998)                               |
|                  | South Africa             | Seasonal (Reeves et al. 1992)                      |
| South America    | South America            | Year-round (Aguayo-Lobo et al. 2011)               |
|                  |                          | Seasonally (Reeves et al. 1992)                    |
| United Kingdom   | Falkland Islands         | Seasonal (Hamilton 1939)                           |
|                  | Pitcairn Islands         | Seasonal (Stewart and Grove 2014)                  |
|                  | South Georgia Islands    | Year-round (Rice 1998)                             |
|                  |                          | Seasonal (Walker et al. 1998)                      |
|                  | South Sandwich Islands   | Seasonal (Hamilton 1939)                           |
|                  | Tristan da Cunha         | Seasonal (Rice 1998)                               |

## References Appendix 1

- Aguayo-Lobo A, Acevedo J, Brito JL, Acuña GP, Bassoi M, Secchi ER, Rosa LD. 2011. Presence of the leopard seal, *Hydrurga leptonyx* (de Blainville, 1820), on the coast of Chile: an example of the Antarctica-South America connection in the marine environment. *Oecologia Australis*. 15(1):69-85.
- Andersson KA. 1908. Das höhere Tierleben im antarktischen Gebiete [The higher animal life in the Antarctic region]. In: Nordenskjöld O, editor. *Wissenschaftliche Ergebnisse der Schwedischen Sudpolar-Expedition 1901-1903. Vol. V, Zoologie I*. Stockholm (SE): Lithographisches Institute des Generalstabs; p. 1-58.
- Bester MN, Roux JP. 1986. Summer presence of leopard seals *Hydrurga leptonyx* at the Courbet Peninsula, Iles Kerguelen. *South African Journal of Antarctic Research*. 16:29-32.
- Brown KG. 1957. The leopard seal at Heard Island, 1951–1954. Australian national Antarctic research expedition interim report no. 16. Melbourne (AU): Commonwealth of Australia Department of External Affairs.
- Falla RA. 1965. The ecology of the subantarctic islands of New Zealand: birds and mammals of the subantarctic islands. *New Zealand Journal of Ecology*. 12:63-68.
- Hamilton JE. 1939. The leopard seal *Hydrurga leptonyx* (de Blainville). *Discovery Reports*. 18:239-264.
- Haynes-Lovell K. 1994. The incidental stranding of pinnipeds on the far northern New South Wales and southern Queensland coasts. Poster session presented at: Marine mammal symposium. 1994. The Australian Mammal Society; July 3-5; Tasmania, AU: p. 19.
- King JE. 1983. *Seals of the world*. London (UK): Oxford University Press.
- Reeves RR, Stewart BS, Leatherwood S. 1992. *The Sierra Club handbook of seals and sirenians*. Hong Kong (CN): Dai Nippon Printing Company Limited.
- Rice DW. 1998. *Marine mammals of the world - systematics and distribution*. Lawrence (KS): Allen Press Incorporated.
- Rounsevell D, Eberhard I. 1980. Leopard seals, *Hydrurga leptonyx* (Pinnipedia), at Macquarie Island from 1949 to 1979. *Australian Wildlife Research*. 7(3):403-415.
- Stewart BS, Grove JS. 2014. An extreme wandering leopard seal, *Hydrurga leptonyx*, at Pitcairn Island, central South Pacific. *Polar Biology*. 37(3):423-425.
- Troughton E. 1951. *Furred animals of Australia*. Sydney (AU): Halstead.
- Walker TR, Boyd IL, McCafferty DJ, Huin N, Taylor RI, Reid K. 1998. Seasonal occurrence and diet of leopard seals (*Hydrurga leptonyx*) at Bird Island, South Georgia. *Antarctic Science*. 10:75-81.
- Wilson EA. 1907. Mammalia (whales and seals / cetacea and pinnipedia). In: National Antarctic expedition 1901-1904, Natural History, Zoology (vertebrata: mollusca: crustacea). Volume II, B. British Museum (Natural History), London (UK); p. 1-69.
- Wilson E. 1966. *Diary of the Discovery expedition to the Antarctic 1901-1904*. London (UK): Blandford Press.

**Appendix 2:** Published records of leopard seal specimens (deceased animals) and sightings in New Zealand.

Published records of leopard seal specimens (deceased animals) and sightings (live animals) in New Zealand waters (including New Zealand Subantarctic islands) are listed in Table 2.1. The date of each record is entered using the format yyyyymmdd (where year, month and day were known, otherwise year, or year + month are indicated). If records were confirmed as the same event (i.e., the same record was cited by subsequent authors) the data were entered herein as one record, with all citations listed (e.g., see the third entry, where two authors, Butts (1977) and Smith (1985) both describe the same leopard seal sighting.

**Table 2.1:** Published records of leopard seal specimens and sightings in New Zealand waters (including New Zealand Subantarctic islands).

| Date first sighted | Type of record | Region                                                                  | Reference(s)                                         |
|--------------------|----------------|-------------------------------------------------------------------------|------------------------------------------------------|
| 1200               | Specimen       | Papatowai Point, Otago <sup>a</sup>                                     | Smith 1985                                           |
| 1400               | Specimen       | Moa Bone Point Cave, Redcliffs, Christchurch, Canterbury                | Smith 1985                                           |
| 1400               | Specimen       | Rotokura, Cable Bay, Nelson, Nelson/Marlborough                         | Butts 1977; Smith 1985                               |
| 1700               | Specimen       | Long Beach, Dunedin <sup>b</sup>                                        | Smith 1985                                           |
| 184311             | Specimen       | Evans Bay, Port Nicholson (Wellington Harbour), Wellington <sup>c</sup> | Richardson 1844; Sherrin 1886                        |
| 1866               | Sighting       | Auckland Islands                                                        | Musgrave 1866                                        |
| 1866               | Specimen       | Nine-mile Bluff                                                         | New Zealand Geological Survey Staff and Fleming 1968 |
| 1885               | Specimen       | Porangahau, East Coast/Hawkes Bay                                       | Hamilton 1885                                        |
| 1907               | Specimen       | Venus Cove, Campbell Island                                             | Waite 1909                                           |
| 1912-1921          | Specimen       | Tipi Bay, Marlborough Sounds, Nelson/Marlborough                        | Grady 1982                                           |
| 19420826           | Sighting       | Perseverance Harbour, Campbell Island                                   | Bailey and Sorensen 1962                             |
| 19430823           | Sighting       | Campbell Island                                                         | Bailey and Sorensen 1962                             |
| 19430906           | Sighting       | Campbell Island                                                         | Bailey and Sorensen 1962                             |
| 19451103           | Sighting       | Shag Rock, Hauraki Gulf, Auckland                                       | Guy 1947                                             |
| 19570816           | Sighting       | Tucker Cove, Campbell Island                                            | Bailey and Sorensen 1962                             |
| 19570912           | Sighting       | Tucker Cove, Campbell Island                                            | Bailey and Sorensen 1962                             |
| 19580213           | Sighting       | Southern coast of Campbell Island                                       | Bailey and Sorensen 1962                             |
| 19580914           | Sighting       | Perseverance Harbour, Campbell Island                                   | Bailey and Sorensen 1962                             |
| 19590726           | Sighting       | Garden Cove, Campbell Island                                            | Bailey and Sorensen 1962                             |
| 19590901           | Sighting       | Tucker Cove, Campbell Island                                            | Bailey and Sorensen 1962                             |
| 19591011           | Sighting       | Tucker Cove, Campbell Island                                            | Bailey and Sorensen 1962                             |
| 19591015           | Sighting       | Old homestead, Campbell Island                                          | Bailey and Sorensen 1962                             |
| 19600811           | Sighting       | Tucker Cove, Campbell Island                                            | Bailey and Sorensen 1962                             |
| 1964               | Sighting       | Wellington                                                              | Gaskin 1972                                          |
| 1966               | Sighting       | Manawatu River                                                          | Gaskin 1972                                          |
| 1967               | Sighting       | Marineland, New Zealand                                                 | Gaskin 1972                                          |
| 197206             | Sighting       | North Arm Beach, Snares Islands                                         | Horning and Fenwick 1978                             |

<https://doi.org/10.1080/00288330.2019.1619598>

| Date first sighted | Type of record | Region                                                       | Reference(s)                                                                       |
|--------------------|----------------|--------------------------------------------------------------|------------------------------------------------------------------------------------|
| 197208             | Sighting       | Hawke's Bay, East Coast/Hawkes Bay <sup>d</sup>              | Davis et al. 1977                                                                  |
| 197208             | Sighting       | Station Cove, Snares Islands                                 | Horning and Fenwick 1978                                                           |
| 1976               | Sighting       | Campbell and Auckland Islands                                | Rounsevell 1988 <sup>2</sup>                                                       |
| 19761123           | Sighting       | Seal Cove, Main island, Snares Islands                       | Horning and Fenwick 1978                                                           |
| 1977               | Sighting       | Campbell and Auckland Islands                                | Rounsevell 1988 <sup>2</sup>                                                       |
| 19770112           | Sighting       | Boat Harbour, Snares Islands                                 | Horning and Fenwick 1978                                                           |
| 1978               | Sighting       | Campbell and Auckland Islands                                | Rounsevell 1988 <sup>2</sup>                                                       |
| 1980               | Sighting       | Campbell and Auckland Islands                                | Rounsevell 1988 <sup>2</sup>                                                       |
| 1981               | Sighting       | Campbell and Auckland Islands                                | Rounsevell 1988 <sup>2</sup>                                                       |
| 1982               | Sighting       | Campbell and Auckland Islands                                | Rounsevell 1988 <sup>2</sup>                                                       |
| 1983               | Sighting       | Campbell and Auckland Islands                                | Rounsevell 1988 <sup>2</sup>                                                       |
| 1984               | Sighting       | Campbell and Auckland Islands                                | Rounsevell 1988 <sup>2</sup>                                                       |
| 1985               | Sighting       | Campbell and Auckland Islands                                | Rounsevell 1988 <sup>2</sup>                                                       |
| 19900612           | Sighting       | Hitaua Bay, Marlborough Sounds, Nelson/Marlborough           | Duffy and Brown 1994                                                               |
| 19900625           | Sighting       | Crail Bay, Pelorus Sound, Nelson/Marlborough                 | Duffy and Brown 1994                                                               |
| 1991               | Sighting       | Marineland, New Zealand                                      | Rogers et al. 1996                                                                 |
| 19960819           | Bycatch        | South Pacific Ocean                                          | Berkenbusch et al. 2013; Abraham et al. 2017                                       |
| 19971001           | Bycatch        | South Pacific Ocean                                          | Berkenbusch et al. 2013; Abraham et al. 2017                                       |
| 200209             | Sighting       | Waitangi, Chatham Islands                                    | Miskelly 2008                                                                      |
| 20050918           | Bycatch        | South Pacific Ocean                                          | Rowe 2009; Abraham and Thompson 2011; Berkenbusch et al. 2013; Abraham et al. 2017 |
| 20070703           | Sighting       | Otago Harbour, Otago                                         | McKinlay et al. 2014                                                               |
| 20121007           | Sighting       | Taiaroa Head, Otago                                          | McKinlay et al. 2014                                                               |
| Unknown            | Specimen       | New Zealand                                                  | Sherrin 1886                                                                       |
| Unknown            | Specimen       | Island Bay, Wellington                                       | Hector 1897                                                                        |
| Unknown            | Sighting       | Port Nicholson (Wellington Harbour), Wellington <sup>e</sup> | Wilson 1907; Scheffer 1958                                                         |
| Unknown            | Sighting       | Waikato River, Waikato                                       | Wilson 1907; Scheffer 1958                                                         |
| Unknown            | Sighting       | Wanganui River, Wanganui                                     | Wilson 1907; Scheffer 1958                                                         |
| Unknown            | Sighting       | Subantarctic islands                                         | Falla 1965                                                                         |
| Unknown            | Sighting       | Snares Islands                                               | King 1983                                                                          |
| Unknown            | Specimen       | Wheritoa, Bay of Plenty                                      | Smith 1985                                                                         |
| Unknown            | Specimen       | Lookout Bluff, Otago <sup>e</sup>                            | Smith 1985                                                                         |
| Unknown            | Specimen       | Omimi, Otago <sup>f</sup>                                    | Smith 1985                                                                         |
| Unknown            | Specimen       | Lookout Bluff, Otago <sup>e</sup>                            | Hamel 2001                                                                         |
| Unknown            | Specimen       | Omimi, Otago <sup>f</sup>                                    | Hamel 2001                                                                         |
| Unknown            | Specimen       | Long Beach, Dunedin, Otago <sup>b</sup>                      | Hamel 2001                                                                         |

| Date first sighted | Type of record | Region                          | Reference(s)             |
|--------------------|----------------|---------------------------------|--------------------------|
| Unknown            | Specimen       | Papatowai, Otago <sup>a</sup>   | Hamel 2001               |
| Unknown            | Bycatch        | Unknown                         | Duignan 2003             |
| Unknown            | Sighting       | Hawke's Bay <sup>d</sup>        | van den Hoff et al. 2005 |
| Unknown            | Sighting       | Westport, West Coast            | van den Hoff et al. 2005 |
| Unknown            | Sighting       | Gisborne, East Coast/Hawkes Bay | van den Hoff et al. 2005 |
| Unknown            | Sighting       | New Plymouth, Whanganui         | van den Hoff et al. 2005 |
| Unknown            | Sighting       | Unknown                         | van den Hoff et al. 2005 |
| Unknown            | Sighting       | Unknown                         | van den Hoff et al. 2005 |

<sup>1</sup> Publication states that record was also collected by A. McKay in 1873.

<sup>2</sup> Rounsevell (1988) included 50 records in 1976, 23 in 1982 and less than 10 per year in 1976, 1978-1981, 1982-1985.

<sup>a-f</sup> Possible duplicate records.

## References Appendix 2

- Abraham ER, Thompson FN. 2011. Summary of the capture of seabirds, marine mammals, and turtles in New Zealand commercial fisheries, 1998-99 to 2008-09. New Zealand aquatic environment and biodiversity report no. 80. Wellington (NZ): Dragonfly.
- Abraham ER, Neubauer P, Berkenbusch K, Richard Y. 2017. Assessment of the risk to New Zealand marine mammals from commercial fisheries. New Zealand aquatic environment biodiversity report no. 189. Wellington (NZ): Ministry for Primary Industries.
- Bailey AM, Sorensen JH. 1962. Subantarctic Campbell Island. Denver (CO): Denver Museum of Natural History.
- Berkenbusch K, Abraham ER, Torres LG. 2013. New Zealand marine mammals and commercial fisheries. New Zealand aquatic environment and biodiversity report no. 119. Wellington (NZ): Ministry for Primary Industries.
- Butts DJ. 1977. Seasonality at Rotokura, Tasman Bay: a case study in the use of faunal identifications to establish the season of occupation for an archaeological site [bachelor thesis]. Dunedin (NZ): University of Otago.
- Davis GB, Stevenson BJ, Kyle RJ, Price MC. 1977. Isolation of an actinomycete from a leopard seal (*Hydrurga leptonyx*). New Zealand Veterinary Journal. 25(10):274.
- Duffy AJ, Brown DA. 1994. Recent observations of marine mammals and a leatherback turtle (*Dermochelys coriacea*) in the Marlborough Sounds, New Zealand, 1981-1990. Occasional publication no. 9. Nelson (NZ): Department of Conservation.
- Duignan PJ. 2003. Disease investigations in stranded marine mammals, 1999-2002. Department of Conservation Science Internal Series 104. Wellington (NZ): Department of Conservation.
- Falla RA. 1965. The ecology of the subantarctic islands of New Zealand: birds and mammals of the subantarctic islands. New Zealand Journal of Ecology. 12:63-68.
- Gaskin DE. 1972. Whales, dolphins and seals: with special reference to the New Zealand region. London (UK): Heinemann Educational.
- Grady D. 1982. The Perano whalers of Cook Strait 1911-1964. Wellington (NZ): A.H. and A.W. Reed Limited.
- Guy G. 1947. Food of sea leopard. New Zealand Bird Notes. 2(6):133.
- Hamel J. 2001. The archaeology of Otago. Wellington (NZ): Department of Conservation.
- Hamilton JE. 1885. Hawkes Bay Philosophical Institute. Hawkes Bay (NZ): Hawkes Bay Philosophical Institute.
- Hector J. 1897. Remarks on a skeleton of a sea-leopardess. In: Hector J, editor. 1897. Transactions and proceedings of the Royal Society of New Zealand, Wellington Philosophical Society, eighth meeting, Nov 24; Wellington (NZ): John Mackay; p. 555.
- Horning DSJ, Fenwick GD. 1978. Leopard seals at the Snares Islands, New Zealand. New Zealand Journal of Zoology. 5(1):171-172.
- King JE. 1983. Seals of the world. London (UK): Oxford University Press.
- McKinlay B, Heseltine S, Loh G. 2014. Seabird predation by vagrant leopard seals (*Hydrurga leptonyx*) at Otago, New Zealand. Notornis. 61:48-50.
- Miskelly C, editor. 2008. Chatham Islands heritage and conservation. 2nd ed. Christchurch (NZ): University of Canterbury Press in association with the Department of Conservation.
- Musgrave T. 1866. An account of the sea lion and its habitats. In: Shillinglaw JJ, editor. Castaway on the Auckland Isles. London (UK): Lockwood and Co.; p. 141-150.
- New Zealand Geological Survey Staff and Fleming CA. 1968. Notes from the New Zealand Geological Survey - 5: New Zealand fossil seals. New Zealand Journal of Geology and Geophysics. 11(5):1184-1187.
- Richardson J. 1844. The zoology of the voyage of the H.M.S. *Erebus* and *Terror*, under the command of Captain Sir James Clark Ross, during the years 1839 to 1843. By authority of the Lords Commissioners of the Admiralty. London (UK): E. W. Janson.
- Rogers TL, Cato DH, Bryden MM. 1996. Behavioural significance of underwater vocalizations of captive leopard seals, *Hydrurga leptonyx*. Marine Mammal Science. 12(3):441-427.
- Rounsevell D. 1988. Periodic irruptions of itinerant leopard seals within the Australasian sector of the Southern Ocean, 1976-86. Papers and Proceedings of the Royal Society of Tasmania. 122(1):189-192.
- Rowe SJ. 2009. Conservation services programme observer report 01 July 2004 to 30 June 2007. Department of Conservation marine conservation services series no. 1. Wellington (NZ): Department of Conservation.

- Scheffer VB. 1958. Seals, sea lions and walruses: a review of pinnipedia. Stanford (CA): Stanford University Press.
- Sherrin RAA. 1886. Handbook of the fishes of New Zealand. Auckland (NZ): Wilsons and Horton.
- Smith IWG. 1985. Sea mammal hunting and prehistoric subsistence in New Zealand [dissertation]. Otago: University of Otago, New Zealand.
- van den Hoff J, Fraccaro R, Mitchell P, Field I, McMahon C, Burton H, Blanchard W, Duignan P, Rogers T. 2005. Estimating body mass and condition of leopard seals. *Journal of Wildlife Management*. 69(3):1015-1023.
- Waite ER. 1909. Vertebrata of the subantarctic islands of New Zealand. *Mammalia*. Proceedings of the Zoological Society 1907. Article XXV:542-600.
- Wilson EA. 1907. Mammalia (whales and seals / cetacea and pinnipedia). In: National Antarctic expedition 1901-1904, Natural History, Zoology (vertebrata: mollusca: crustacea). Volume II, B. British Museum (Natural History), London (UK); p. 1-69.



### **Appendix 3:** Museum records and Archives New Zealand.

#### Museum Records

Specimens of leopard seals originating in New Zealand and held in Museums were located by searching the published literature and online databases. Additionally, museums were contacted and were requested to supply data accompanying any specimens sourced from New Zealand. The museums contacted included Auckland Museum, Canterbury Museum, Dargaville Kumara Box (private museum), Hawkes Bay Museum, Museum of New Zealand Te Papa Tongarewa, Otago Museum, Southland Museum and Whanganui Regional Museum.

We searched the document archives at Museum of New Zealand Te Papa Tongarewa (formerly Dominion Museum) and examined correspondence, reports and newspaper clippings from 1929 to 1974 held in the MU000002/50 series of files.

We examined archived notebooks, images, reports and correspondence held at the National Library of New Zealand (Alexander Turnbull Library). Robert Falla's and Charles Fleming's archives relating to the Cape expedition (Auckland and Campbell Islands 1941-1945), Auckland Island expeditions (1954, 1962-1963, 1966), and diaries and notes from Campbell Island meteorological staff (1955-1960).

We searched published and online records for New Zealand leopard seal specimens held in museums overseas.

#### Archives New Zealand

The New Zealand Government online archival system, Archives New Zealand<sup>1</sup>, contains historic and contemporary records and links to other online databases. Using this we compiled online records and located the whereabouts of hard copies.

We accessed the hardcopy records of Archives New Zealand in Christchurch including: Antarctic General; United States Antarctic Research Programme and National Science Foundation (R1127969), projects & programmes: University of Canterbury – seal census (R937292), marine mammals – seal reports (R21905614), projects and programmes – general (R1127968), policy & programme – N.Z. Alpine Club expedition (R1127819), Antarctic programme – not logistics (R1127784), and general – information enquiries (R1127728 and R1127730).

In Wellington, we accessed the hard copy records of Archives New Zealand including: Wildlife in captivity - New Zealand zoos, gardens, etc - Napier Council (R2262793), New Zealand Wildlife Service - Hawke's Bay – wildlife in captivity - Napier City Council (R24816428), Department of lands and survey – coastal marine – Edwin Fox (R1127968), seals-general file (R19978627; R19978630; R19978631), and fish & fisheries / seals-protection of seals & general (R23476419).

---

<sup>1</sup> <https://archives.govt.nz/>



**Appendix 4: Measurements of leopard seals (standard/estimated length).**

While leopard seals are often measured using a straight-line distance from the tip of the snout to the tip of the tail, this methodology can be difficult to apply if the animal is not physically handled, because leopard seals usually position their tail between their hind flippers, i.e., the tail is not always visible or available as a measurement point. Therefore, for this study leopard seals (alive or dead) were measured using a straight-line distance from the tip of the snout to the tip of the hind flipper (as adapted from Staniland et al. 2018). While we recognise that this methodology may result in overall greater lengths for leopard seals (which may prohibit direct comparison to other studies), it is considered robust for comparisons within the New Zealand leopard seal population and other studies where the seals are not handled for measurements.

If the leopard seal was dead, full necropsy measurements were taken (adapted from Pugliares et al. 2007). These measurements were from the tip of snout to the tip of tail and the tip of snout to the tip of the hind flippers.

In order to minimise disturbance to live leopard seals, measurements were taken in two different ways:

1. A rope marked at 50cm intervals was placed alongside the animal (Figure 4.1). To mitigate any disturbance to the seal, the rope was positioned by two researchers who remained at distances of at least 10m from either end of the seal (i.e. at least 10m from both the head and hind flippers).

The rope was then slowly moved to lie approximately 1m from the seal and parallel to its body. A photograph was then taken of the seal next to the rope, noting the two points on the measuring tape which aligned with the tip of the snout and the tip of the tail.

Depending on the seals behaviour, the rope was either promptly removed, or it was left in position and collected after the seal had departed. Once the rope was removed or the seal had departed, the distance between the two points on the rope was recorded.

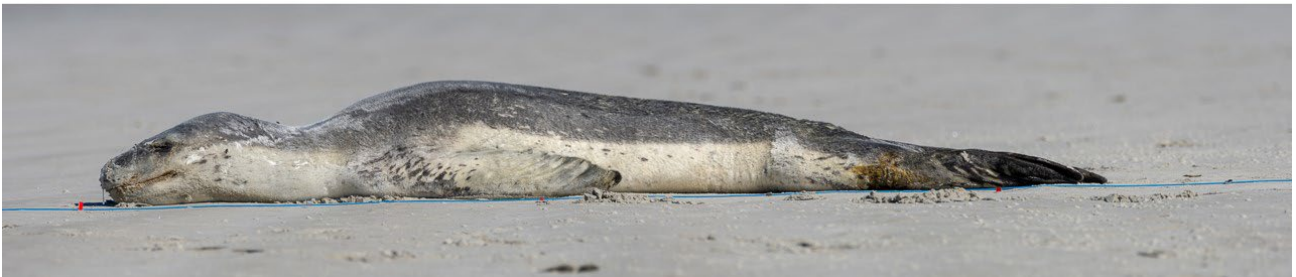

**Figure 4.1:** A marked rope (blue line in photo above) is carefully placed approximately 1m away, and parallel to, a leopard seal. Photograph by LeopardSeals.org.

2. If a rope marker could not be used, a photograph was taken of the seal in alignment with two points which acted as visual markers of the position of the tip of the snout and the tip of the hind flippers (Figure 4.2). Once the seal had departed, the distance between the two points was measured.

A variation of this two-point measurement method, was to draw marks on the ground (e.g., in the sand), or to place two markers on the ground, at 90° to the tip of the snout and the tip of the hind-flippers. In all instances these marks were placed at least 10m away from the leopard seal, therefore although the measurement of the seal was done as a ‘proxy’ length, this method was estimated to be within 5cm of the actual length of the seal.

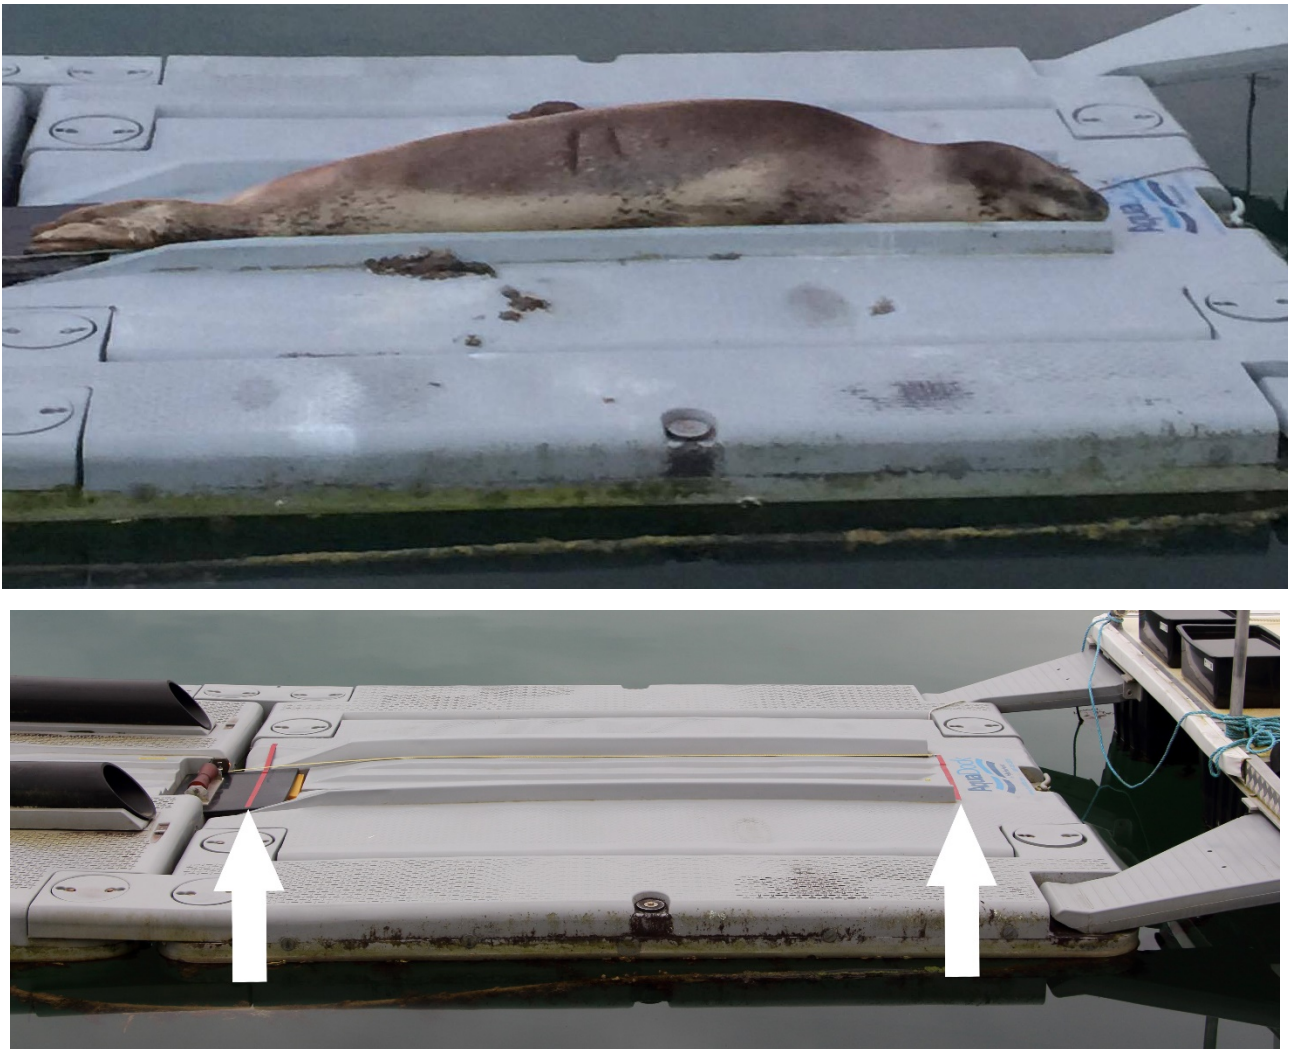

**Figure 4.2:** A leopard seal lying on a pontoon, where two points can be subsequently used to ‘proxy’ measure the length of the animal after it has departed. The white arrows indicate the red tape placed to mark the previous position of the leopard seal. Photographs by LeopardSeals.org.

#### References Appendix 4

Pugliares KR, Bogomolni AL, Touhey KM, Herzig SM, Harry CT, Moore MJ. 2007. Marine mammal necropsy: an introductory guide for stranding responders and field biologists. Technical Report. Woods Hole (USA): Woods Hole Oceanographic Institution.

Staniland IJ, Ratcliffe N, Trathan PN, Forcada J. 2018. Long term movements and activity patterns of an Antarctic marine apex predator: the leopard seal. *PloS One*. 13(6):pe0197767.

# Appendix 5: Assessment of leopard seals threat status against the New Zealand Threat Classification System (NZTCS).

The New Zealand Threat Classification System (the official New Zealand Government system for assigning threat classifications to taxa; NZTCS; Townsend et al. 2008) includes a flowchart to classify New Zealand taxa as; 'Extinct', 'Non-Resident' (including 'Vagrant', 'Migrant' and 'Coloniser' categories) or 'Data Deficient' (Figure 5.1). When taxa do not meet the criteria for any of these categories they are classified as 'Resident'.

**Figure 5.1:** The New Zealand Threat Classification System flowchart used to determine threat status categories (including 'Extinct', 'Vagrant', 'Migrant' 'Coloniser' and 'Data Deficient') (Townsend et al. 2008).

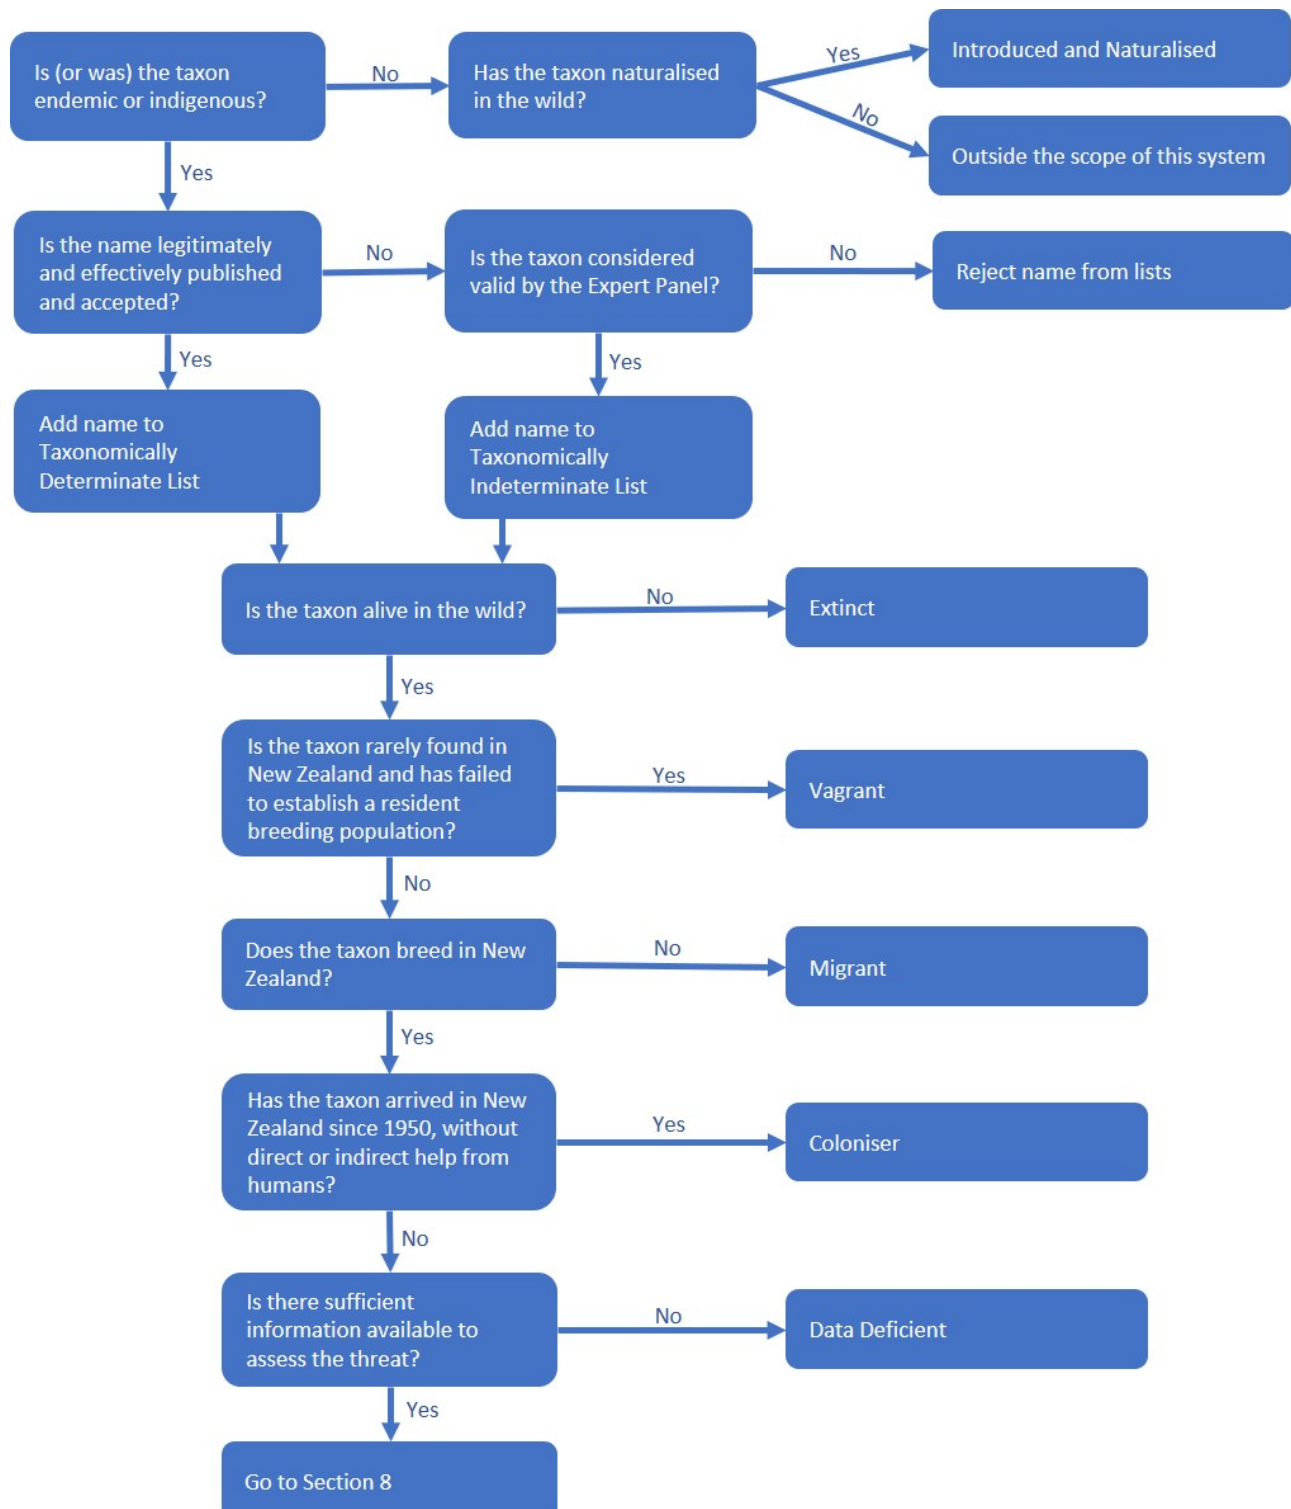

Using the flowchart in Figure 5.1 and our current knowledge of leopard seals in New Zealand (Table 5.1), we assessed the threat status of this species in NZ waters (Table 5.1) and determined that they are a 'Resident' species.

**Table 5.1:** Assessment to determine if leopard seals in New Zealand are a 'Non-resident' or 'Resident' species (questions in the New Zealand Threat Classification System; Townsend et al. 2008).

| Threat status questions<br>(In Townsend, et al. 2008)                                                           | Current knowledge<br>(Assessed by Hupman et al. 2019)                                                                                                                                                                                   | Threat status assessment<br>(Assessed by Hupman et al. 2019) |
|-----------------------------------------------------------------------------------------------------------------|-----------------------------------------------------------------------------------------------------------------------------------------------------------------------------------------------------------------------------------------|--------------------------------------------------------------|
| "Is (or was) the taxon endemic or indigenous?"                                                                  | Yes - Occurrence in New Zealand since the 1200s as evidenced by bones found in Maori middens (Smith 1985).                                                                                                                              | Does not meet criteria for 'Introduced or Naturalised'       |
| "Is the name legitimately and effectively published and accepted? - add name to Taxonomically Determinate list" | Yes - Common English name; leopard seal. Scientific name <i>Hydrurga leptonyx</i> . Also see Rice (1998).<br>Described by de Blainville (1820). Also see Rice (1998).                                                                   | Meets criteria for assessment to proceed                     |
| "Is the taxon alive in the wild?"                                                                               | Yes - As evidenced in the New Zealand Leopard Seal Database.                                                                                                                                                                            | Does not meet criteria for 'Extinct'                         |
| "Is the taxon regularly found in New Zealand and has failed to establish a resident breeding population?"       | Yes - Regularly found year-round in all regions of New Zealand.<br>No - as has established a resident breeding population (based on births – using criteria applied to other marine mammals by the NZTCS expert Panel) <sup>1,2</sup> . | Does not meet criteria for 'Vagrant'                         |
| "Does the taxon breed in New Zealand?"                                                                          | Yes - Established a resident breeding population (based on births - using criteria applied to other marine mammals by the NZTCS expert Panel) <sup>1,2</sup> .                                                                          | Does not meet criteria for 'Migrant'                         |
| "Has the taxon arrived in New Zealand since 1950, without direct or indirect help from humans?"                 | No - Occurrence in New Zealand since the 1200s as evidenced by bones found in Maori middens (Smith 1985).                                                                                                                               | Does not meet criteria for 'Coloniser'                       |
| Are the taxa 'data deficient'? <sup>3</sup>                                                                     | No - As evidenced by numerous publications and information in the NZLSD.                                                                                                                                                                | Does not meet criteria for 'Data Deficient'                  |
| Is the taxa resident? <sup>2,3</sup>                                                                            | Yes - As evidenced in Hupman et al. 2019 and this table.                                                                                                                                                                                | Meets the criteria for 'Resident'                            |

<sup>1</sup> There is no definition of breeding in Townsend et al. (2008).

<sup>2</sup> See Footnote 4 in main text of Hupman et al. (2019) for explanation of the New Zealand Government Department of Conservation NZTCS Marine Mammal Expert Panel.

<sup>3</sup> Question inferred from flowchart in NZTCS (Townsend et al. 2008).

## References Appendix 5

- Hupman K, Visser IN, Fyfe J, Cawthorn M, Forbes G, Grabham AA, Bout R, Mathias B, Benninghaus E, Matucci K, Cooper T, Fletcher L, Godoy D. 2019 (this study). From Vagrant to Resident: occurrence, residency and births of leopard seals (*Hydrurga leptonyx*) in New Zealand waters. New Zealand Journal of Marine and Freshwater Research. <https://doi.org/10.1080/00288330.2019.1619598>.
- Smith IWG. 1985. Sea mammal hunting and prehistoric subsistence in New Zealand [dissertation]. Otago: University of Otago, New Zealand.
- Townsend AJ, de Lange PJ, Duffy CAJ, Miskelly CM, Molloy J, Norton D. 2008. New Zealand threat classification system manual. Wellington (NZ): Department of Conservation.
